# Supplementary material for: Folding Dynamics of 3,4,3-LI(1,2-HOPO) in Its Free and Bound State with U4+ Implicated by MD Simulations
Source: MDPI journal article supplement (doi:10.3390/molecules27238151), 2022-11-23
Supplement: s1 [file s1]

# Supporting Information

## Folding Dynamics of 3,4,3-LI(1,2-HOPO) in Its Free and Bound State with U<sup>4+</sup> Implicated by MD Simulations

Qin Wang <sup>1,2</sup>, Ziyi Liu <sup>2,\*</sup>, Yu-Fei Song <sup>1,\*</sup> and Dongqi Wang <sup>2,3,\*</sup>

- <sup>1</sup> State Key Laboratory of Chemical Resource Engineering, Beijing Advanced Innovation Center for Soft Matter Science and Engineering, Beijing University of Chemical Technology, Beijing 100029, China; 2019400226@buct.edu.cn
- <sup>2</sup> State Key Laboratory of Fine Chemicals, Liaoning Key Laboratory for Catalytic Conversion of Carbon Resources, School of Chemical Engineering, Dalian University of Technology, Dalian 116024, China
- <sup>3</sup> CAS-HKU Joint Laboratory of Metallomics on Health and Environment, Multidisciplinary Initiative Center, Institute of High Energy Physics, Chinese Academy of Sciences, Beijing 100049, China
- \* Correspondence: liuziyi@dlut.edu.cn (Z.L.); songyf@mail.buct.edu.cn (Y.-F.S.); wangdq@dlut.edu.cn (D.W.)

Table S1. The number of clusters sampled in the simulations of *t*-HOPO, *t*-HOPO<sup>4-</sup> and U<sup>IV</sup>-*t*-HOPO complex systems, respectively, using three cutoff values. The proportions of main clusters in each system are also shown.

|                                     | <i>t</i> -HOPO |      |       | <i>t</i> -HOPO <sup>4-</sup> |       |       | U <sup>IV</sup> - <i>t</i> -HOPO complex |      |      |
|-------------------------------------|----------------|------|-------|------------------------------|-------|-------|------------------------------------------|------|------|
| Cutoff (nm)                         | 0.05           | 0.18 | 0.35  | 0.05                         | 0.18  | 0.35  | 0.05                                     | 0.18 | 0.35 |
| Num of clusters                     | 4643           | 244  | 13    | 2394                         | 44    | 4     | 26                                       | 1    | 1    |
| The proportion of main clusters (%) |                |      |       |                              |       |       |                                          |      |      |
| Cluster1                            | 0.40           | 5.50 | 59.08 | 2.82                         | 59.74 | 97.68 | 51.10                                    | 100  | 100  |
| Cluster2                            | 0.32           | 4.08 | 17.36 | 1.70                         | 6.98  | 1.62  | 23.98                                    | /    | /    |
| Cluster3                            | 0.22           | 3.18 | 10.84 | 1.28                         | 5.80  | 0.64  | 16.30                                    | /    | /    |
| Cluster4                            | 0.20           | 2.96 | 5.02  | 1.16                         | 4.00  | 0.06  | 3.90                                     | /    | /    |
| Cluster5                            | 0.16           | 2.84 | 4.04  | 1.16                         | 3.52  | /     | 1.34                                     | /    | /    |
| Cluster6                            | 0.16           | 2.60 | 1.22  | 0.92                         | 2.66  | /     | 0.86                                     | /    | /    |

Table S2. The compositions of the systems to simulate *t*-HOPO, *t*-HOPO<sup>4-</sup> and U<sup>IV</sup>-*t*-HOPO in aqueous phase.

| Systems                          | N <sub>HOPO</sub> | N <sub>U4+</sub> | N <sub>Na</sub> | N <sub>water</sub> | Sampling time (ns) | Box size (nm <sup>3</sup> ) |
|----------------------------------|-------------------|------------------|-----------------|--------------------|--------------------|-----------------------------|
| <i>t</i> -HOPO                   | 1                 | 0                | 0               | 1559               | 100                | 3.844*3.678*3.391           |
| <i>t</i> -HOPO <sup>4-</sup>     | 1                 | 0                | 4               | 1541               | 100                | 3.842*3.699*3.308           |
| U <sup>IV</sup> - <i>t</i> -HOPO | 1                 | 1                | 0               | 1500               | 100                | 3.459*3.602*3.683           |

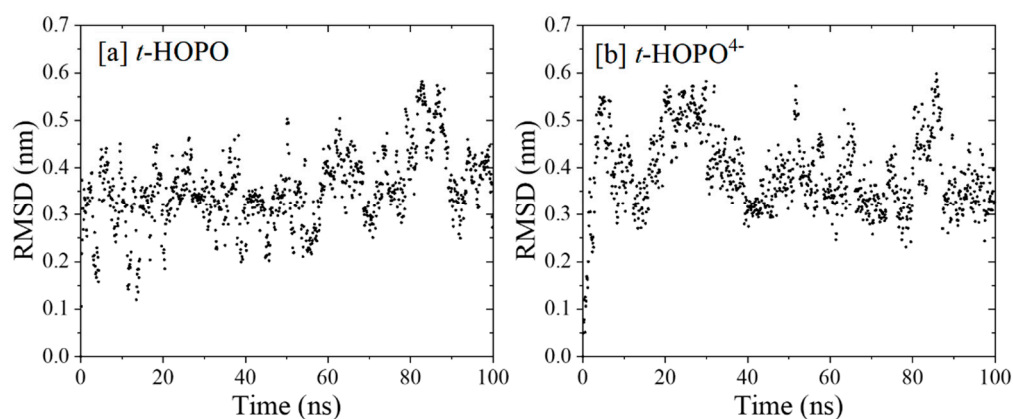

Figure S1. Atomic positional RMSD of all atoms of *t*-HOPO (a) and *t*-HOPO<sup>4-</sup> (b). The structure of the first frame in each simulation was used as the reference.

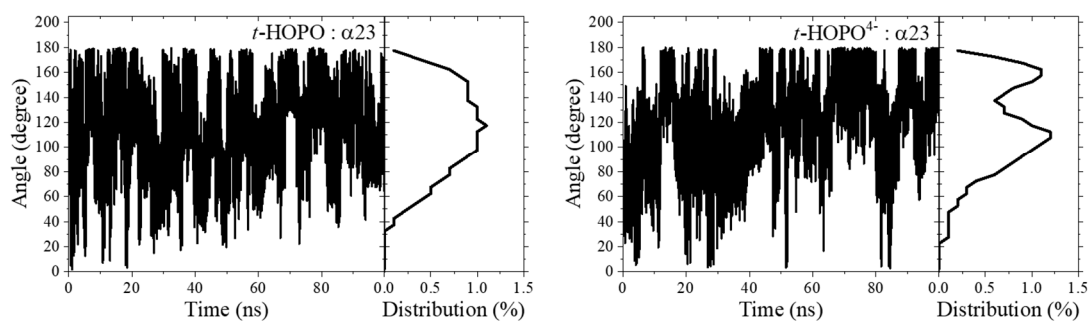

Figure S2. The time evolution of the angle between Plane2 and Plane3 ( $\alpha_{23}$ ) and their populations in the simulations of *t*-HOPO in its neutral (left) and deprotonated (right) states.

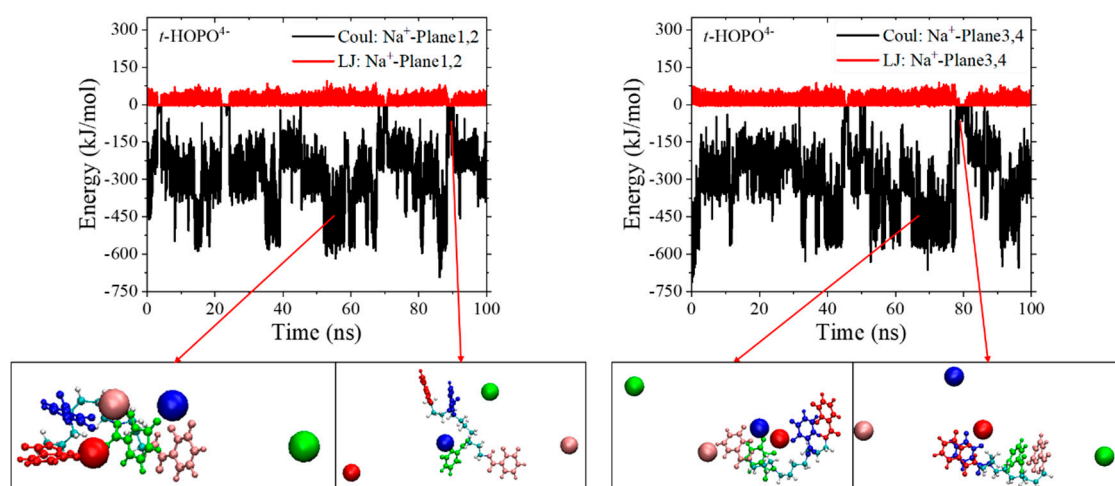

Figure S3. The time evolution of the interaction between Na<sup>+</sup> counterion and the m-HOPO units in the simulations of *t*-HOPO<sup>4-</sup> and the typical conformations in the simulation. Color scheme: Plane1 and Na1 in red, Plane2 and Na2 in blue, Plane3 and Na3 in green, Plane4 and Na4 in pink.

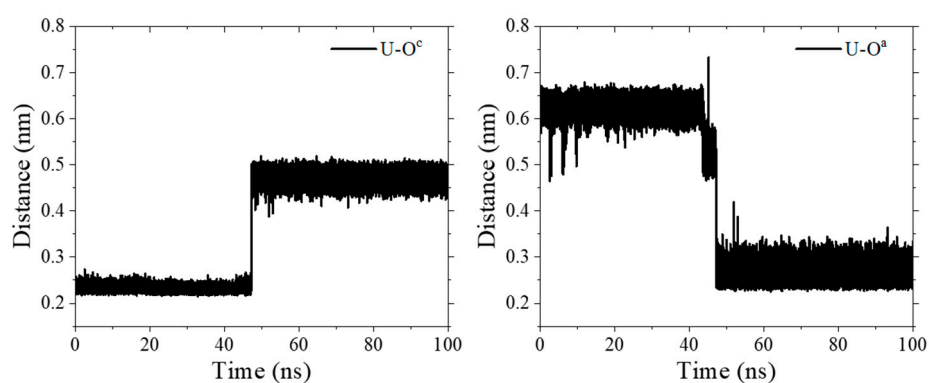

Figure S4. The time evolution of distances between  $U^{4+}$  and  $O^c$ ,  $U^{4+}$  and  $O^a$ .

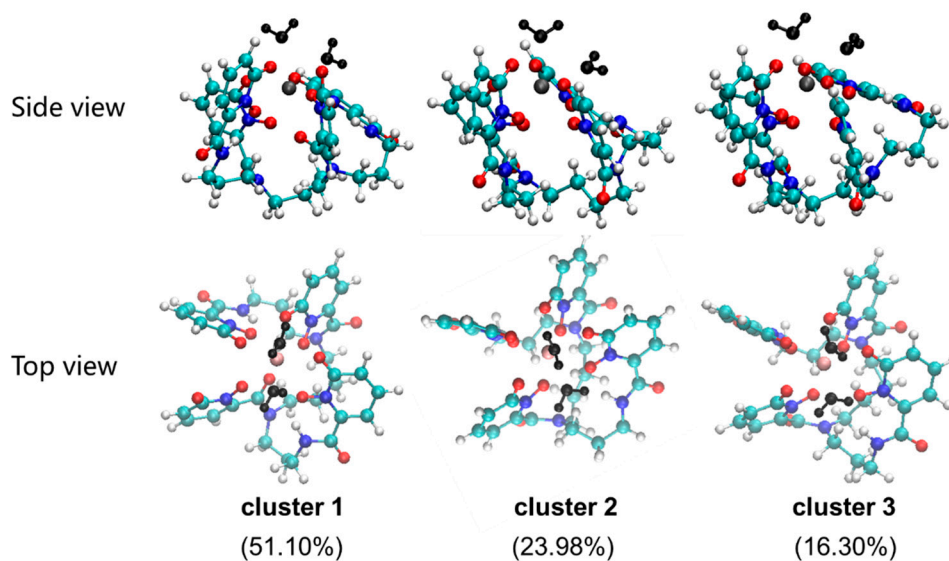

Figure S5. The central structures of the top three clusters in the simulations of  $U^{IV}$ -*t*-HOPO complex with side view (top) and top view (below). Color scheme: N atoms in blue, O atoms in red, water molecules in black, C atoms in cyan, H atoms in white, and U atom in brown.

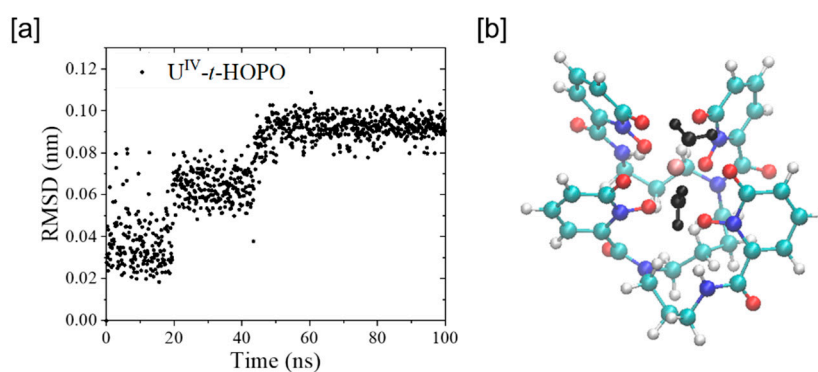

Figure S6. (a) Atomic positional RMSD of all atoms of  $U^{IV}$ -*t*-HOPO complex with the structure of first frame in the simulation used as the reference. (b) The structure of first frame in the simulation.
